# Supplementary material
Source: PubMed Central journal article supplement (PMC3241880)
Supplement: NIHMS340018-supplement-1.pdf [file NIHMS340018-supplement-1.pdf]

**Supplemental Table** Primers of genes analyzed by qRT-PCR.

| <b>Gene</b> | <b>FOR primer</b>            | <b>REV primer</b>            | <b>Annealing temp (°C)</b> |
|-------------|------------------------------|------------------------------|----------------------------|
| CCL2        | AGGTCCCTGTCATGCTTCTG         | TCTGGACCCATTCCCTTCTTG        | 60                         |
| CCL3        | ATGAAGGTCTCCACCACTGCCCTTG    | GGCATTTCAGTTCCAGGTCAGTGAT    | 60                         |
| CCL5        | GAAGATCTCTGCAGCTGCCCT        | GCTCATCTCCAAATAGTTGA         | 60                         |
| CXCL2       | TCCAGAGCTTGAGTGTGACG         | TTCAGGGTCAAGGCAAACCTT        | 60                         |
| CXCL9       | GAGTTCGAGGAACCCTAGTGATAAGGAA | AGGTTTGATCTCCGTTCTTCAGTGTAGC | 60                         |
| CXCL10      | GCCGTCATTTTCTGCCTCAT         | GCTTCCCTATGGCCCTCATT         | 60                         |
| SELE        | GGT AGT TGC ACT TTC TGC GG   | GCA GCA TGT TCT TCA TAC TG   | 60                         |
| VCAM1       | CAA GGG TGA CCA GCT CAT GAA  | TGT GCA GCC ACC TGA GAT CC   | 60                         |
| ICAM1       | GCT CGG AGG ATC ACA AAC G    | GAG TGG TAC AGT ACT GTC AG   | 60                         |
| TLR1        | ACCTACCCTTGCAAACAA           | GTGGCACAAGATCACCTTT          | 60                         |
| TLR2        | TTGCTCCTGCGAACTCCTAT         | GCTTTCTTGGGCTTCCTCTT         | 60                         |
| TLR3        | TTGTCTTCTGCACGAACCTG         | CGCAACGCAAGGATTTTATT         | 60                         |
| TLR4        | CAGCAAAGTCCCTGATGACA         | AGAGGTGGTGTAAAGCCATGC        | 60                         |
| TLR5        | ACGCACCACACTTCAGCA           | TTGAGGATCCAGGGAATCTG         | 60                         |
| TLR6        | ACACAATCGGTTGCAAAACA         | GGAAAGTCAGCTTCGTCAGG         | 60                         |
| TLR7        | TGGAAATTTTGGACCTCAGC         | TTGCAAAGAAAGCGATTGTG         | 60                         |
| TLR8        | GGCACAACCTCCCTTGTGATT        | CATTTGGGTGCTGTTGTTTG         | 60                         |
| TLR9        | TCGCTTTGTGGACTTGTGAG         | GGCTCAGGCTAAGACACTGG         | 60                         |
| 18s         | GGACCAGAGCGAAAGCATTTGC       | CGCCAGTCGGCATCGTTTATG        | 60                         |
